# Supplementary material for: A novel RNA sequencing data analysis method for cell line authentication
Source: PubMed Central journal article supplement (PMC5305277; doi:10.1371/journal.pone.0171435), 2017-02-13
Supplement: pone.0171435.s009.pdf [file pone.0171435.s009.pdf]

# RNA-seq data analysis for cancer cell line authentication

This R Markdown document describes the analyses performed in order to reach the data, figures and tables included in the article. Annotated variant calling data for the COLO205 cell line is included and used to show the general workflow of the authentication pipeline, as well as files of the collected authentication data for all eight cell lines used in this study.

## Load and pre-process variant calling data

The file `variant.calls.colo205.txt` is included in the R Markdown directory.

```
data = read.table('variant.calls.colo205.txt', sep='\t', quote=NULL, comment='',
                 stringsAsFactor=FALSE)
names(data) = c('chr', 'pos', 'rsID', 'REF', 'ALT', 'gene', 'ENSTID', 'ENSGID',
               'impact', 'effect', 'feature.type', 'transcript.biotype',
               'sample_1', 'sample_2', 'DP', 'filter', 'AD', 'nucleotide',
               'amino.acid', 'warnings')
data$ALT = gsub('\\[|\\]', '', data$ALT)

# Remove duplicated positions and indels; add sample name.
data = data[!duplicated(data[, c('chr', 'pos', 'ENSGID')]), ]
data = data[(nchar(data$sample_1) == 1 & nchar(data$sample_2) == 1), ]
data$sample = 'COLO205'

# Convert to GRanges object for quick and efficient comparison with COSMIC data.
suppressPackageStartupMessages(library("GenomicRanges"))
data.gr =
  makeGRangesFromDataFrame(data, keep.extra.columns=TRUE,
                           ignore.strand=TRUE, seqinfo=NULL,
                           seqnames.field='chr', start.field="pos",
                           end.field="pos", starts.in.df.are.0based=FALSE)

# Keep only chromosomes 1 through 22, X and Y.
seqlevels(data.gr) = gsub("chr", "", seqlevels(data.gr))
data.gr = keepSeqlevels(data.gr, c(as.character(1:22), 'X', 'Y'))
data.gr
```

## GRanges object with 87441 ranges and 19 metadata columns:

```
##           seqnames           ranges strand |           rsID
##           <Rle>             <IRanges> <Rle> | <character>
##           1             1       [14930, 14930] * | rs75454623
##           3             1       [14930, 14930] * | rs75454623
##           10            1       [14933, 14933] * | rs199856693
##           12            1       [14933, 14933] * | rs199856693
##           19            1       [20129, 20129] * | rs202081272
##           ...           ...           ...   ... | ...
## 370640           X [154350245, 154350245] * | None
## 370641           X [154350245, 154350245] * | None
## 370645           Y [ 21152851, 21152851] * | None
## 370647           Y [ 21152851, 21152851] * | None
## 370648           Y [ 21152851, 21152851] * | None
```

```

##          REF          ALT          gene          ENSTID
##    <character> <character> <character>    <character>
##      1          A          G          DDX11L1 ENST00000515242
##      3          A          G          WASH7P  ENST00000538476
##     10          G          A          DDX11L1 ENST00000518655
##     12          G          A          WASH7P  ENST00000541675
##     19          C          T          WASH7P  ENST00000438504
##     ...          ...          ...          ...          ...
## 370640          G          None         BRCC3  ENST00000340647
## 370641          G          None         MTCP1  ENST00000476116
## 370645          T          None         TTTY14 ENST00000452584
## 370647          T          None         CD24P4 ENST00000382840
## 370648          T          None         ZNF839P1 ENST00000403487
##          ENSGID          impact          effect feature.type
##    <character> <character>          <character> <character>
##      1 ENSG00000223972  MODIFIER downstream_gene_variant  transcript
##      3 ENSG00000227232  MODIFIER          intron_variant  transcript
##     10 ENSG00000223972  MODIFIER downstream_gene_variant  transcript
##     12 ENSG00000227232  MODIFIER          intron_variant  transcript
##     19 ENSG00000227232  MODIFIER          intron_variant  transcript
##     ...          ...          ...          ...          ...
## 370640 ENSG00000185515  MODIFIER downstream_gene_variant  transcript
## 370641 ENSG00000214827  MODIFIER          intron_variant  transcript
## 370645 ENSG00000176728  MODIFIER          intron_variant  transcript
## 370647 ENSG00000185275  MODIFIER downstream_gene_variant  transcript
## 370648 ENSG00000217896  MODIFIER downstream_gene_variant  transcript
##          transcript.biotype  sample_1  sample_2
##          <character> <character> <character>
##      1 transcribed_unprocessed_pseudogene  A  G
##      3          unprocessed_pseudogene  A  G
##     10 transcribed_unprocessed_pseudogene  G  A
##     12          unprocessed_pseudogene  G  A
##     19          unprocessed_pseudogene  C  T
##     ...          ...          ...          ...
## 370640          protein_coding  G  G
## 370641          processed_transcript  G  G
## 370645          lincRNA  T  T
## 370647          processed_pseudogene  T  T
## 370648          processed_pseudogene  T  T
##          DP          filter          AD          nucleotide amino.acid
##    <integer> <character> <character>    <character> <character>
##      1          13          None         [6, 7]    n.*1653A>G
##      3          13          None         [6, 7]    n.1491+70T>C
##     10          13          None         [9, 4]    n.*1483G>A
##     12          13          None         [9, 4]    n.949+37C>T
##     19          38          None         [28, 10] n.205-1750G>A
##     ...          ...          ...          ...          ...
## 370640          59          None         59          c.
## 370641          59          None         59          n.
## 370645          140         None         140         n.
## 370647          140         None         140         n.
## 370648          140         None         140         n.
##          warnings          sample
##    <character> <character>

```

```
##      1          COL0205
##      3          COL0205
##     10          COL0205
##     12          COL0205
##     19          COL0205
##     ...          ...
## 370640          COL0205
## 370641          COL0205
## 370645          COL0205
## 370647          COL0205
## 370648          COL0205
## -----
## seqinfo: 24 sequences from an unspecified genome; no seqlengths
```

## Load COSMIC data

The file *CosmicCLP\_MutantExport.txt* (GRCh37 assembly) is included in the R Markdown directory, but can also be downloaded at the COSMIC website. (Forbes et al. 2015)

```
cosmic.all = read.table('CosmicCLP_MutantExport.txt', header=TRUE, sep='\t',
                        quote=NULL, comment='', stringsAsFactors=FALSE)
cosmic.all = cosmic.all[c('Gene.name', 'Accession.Number', 'Sample.name',
                          'Mutation.ID', 'Mutation.CDS', 'Mutation.AA', 'Mutation.Description',
                          'Mutation.zygotity', 'Mutation.genome.position', 'strand',
                          'Mutation.somatic.status', 'Mutation.verification.status')]
names(cosmic.all) = tolower(names(cosmic.all))

# Subset for COL0205 data.
cosmic.all$sample.name = tolower(gsub('[-_ ]', '', cosmic.all$sample.name))
cosmic = cosmic.all[grep('colo205', cosmic.all$sample.name), ]

# Remove duplicated positions and indels; store number of unique SNPs.
cosmic$gene.name = gsub('_ENST\\d+', '', cosmic$gene.name)
cosmic = cosmic[!duplicated(cosmic[, c('gene.name',
                                       'mutation.genome.position')]), ]
cosmic = cosmic[grep('Substitution', cosmic$mutation.description), ]
n.unique.snps = dim(cosmic)[1]

# Separate chromosomes and positions.
positions = data.frame(do.call(rbind, strsplit(as.vector(
  cosmic$mutation.genome.position), split = ":-")))
names(positions) = c('chr', 'start', 'end')
cosmic = cbind(cosmic, positions)
cosmic$start = as.numeric(as.character(cosmic$start))
cosmic$end = as.numeric(as.character(cosmic$end))

# Get reference and alternative nucleotides.
mut = as.character(cosmic$mutation.cds)
cosmic$REF.cosmic = substr(cosmic$mutation.cds, nchar(mut)-2, nchar(mut)-2)
cosmic$ALT.cosmic = substr(cosmic$mutation.cds, nchar(mut), nchar(mut))

# Complement the reverse strand mutations for comparison with all-forward VCF.
idx = row.names(subset(cosmic, strand=='-'))
```

```

cosmic[idx, 'REF.cosmic'] = chartr('ATCG','TAGC', cosmic[idx, 'REF.cosmic'])
cosmic[idx, 'ALT.cosmic'] = chartr('ATCG','TAGC', cosmic[idx, 'ALT.cosmic'])
cosmic$strand = NULL

```

```

# Get the COSMIC alleles.

```

```

cosmic$cosmic_1 = cosmic$REF.cosmic
cosmic[cosmic$mutation.zygotity == 'hom', 'cosmic_1'] =
  cosmic[cosmic$mutation.zygotity == 'hom', 'ALT.cosmic']
cosmic$cosmic_2 = cosmic$ALT.cosmic

```

```

# Convert to GRanges object and remove unwanted chromosomes.

```

```

cosmic.gr =
  makeGRangesFromDataFrame(cosmic, keep.extra.columns=TRUE,
    ignore.strand=TRUE, seqinfo=NULL,
    seqnames.field='chr', start.field="start",
    end.field="end", starts.in.df.are.0based=FALSE)
seqlevels(cosmic.gr, force=TRUE) = c(as.character(1:22), 'X', 'Y')
cosmic.gr

```

```

## GRanges object with 235 ranges and 15 metadata columns:

```

```

##           seqnames           ranges strand | gene.name
##           <Rle>             <IRanges> <Rle> | <character>
##      2523           7 [140453136, 140453136] * | BRAF
##      5776           9 [119976858, 119976858] * | ASTN2
##     16739          10 [ 50369665,  50369665] * | C10orf128
##     18114           9 [ 90263726,  90263726] * | DAPK1
##     25195           5 [140256399, 140256399] * | PCDHA12
##      ...           ...           ...     ... ..
##     973795          11 [ 4936069,  4936069] * | OR51G2
##     978788          11 [57268637, 57268637] * | SLC43A1
##     980288          11 [56185040, 56185040] * | OR5R1
##    1009268          16 [21893168, 21893168] * | LOC440345
##    1019245          19 [14181774, 14181774] * | EEF1DP1
##           accession.number sample.name mutation.id mutation.cds
##           <character> <character> <character> <character>
##      2523 ENST00000288602   colo205   COSM476   c.1799T>A
##      5776 ENST00000361209   colo205   COSM69737   c.794G>A
##     16739 ENST00000474718   colo205   COSM296662   c.272G>A
##     18114 ENST00000358077   colo205   COSM319793   c.1360C>T
##     25195 ENST00000398631   colo205   COSM590012   c.1342G>A
##      ...           ...           ...     ... ..
##     973795 ENST00000322013   colo205   COSM4192729   c.825C>T
##     978788 ENST00000278426   colo205   COSM4197407   c.320G>A
##     980288 ENST00000312253   colo205   COSM4196194   c.669C>T
##    1009268 XM_496125.1   colo205   COSM4257525   c.3584A>T
##    1019245 ENST00000344943   colo205   COSM4278511   c.565C>G
##           mutation.aa           mutation.description mutation.zygotity
##           <character>           <character>           <character>
##      2523 p.V600E   Substitution - Missense           het
##      5776 p.R265Q   Substitution - Missense           het
##     16739 p.R91Q    Substitution - Missense           het
##     18114 p.R454C   Substitution - Missense           het
##     25195 p.V448M   Substitution - Missense           het

```

```

##      ...      ...      ...      ...
##  973795      p.H275H Substitution - coding silent      het
##  978788      p.R107Q      Substitution - Missense      het
##  980288      p.A223A Substitution - coding silent      het
##  1009268      p.K1195I      Substitution - Missense      het
##  1019245      p.P189A      Substitution - Missense      het
##      mutation.genome.position
##      <character>
##      2523      7:140453136-140453136
##      5776      9:119976858-119976858
##      16739      10:50369665-50369665
##      18114      9:90263726-90263726
##      25195      5:140256399-140256399
##      ...      ...
##  973795      11:4936069-4936069
##  978788      11:57268637-57268637
##  980288      11:56185040-56185040
##  1009268      16:21893168-21893168
##  1019245      19:14181774-14181774
##      mutation.somatic.status
##      <character>
##      2523      Reported in another cancer sample as somatic
##      5776      Reported in another cancer sample as somatic
##      16739      Reported in another cancer sample as somatic
##      18114      Reported in another cancer sample as somatic
##      25195      Reported in another cancer sample as somatic
##      ...      ...
##  973795      Variant of unknown origin
##  978788      Variant of unknown origin
##  980288      Variant of unknown origin
##  1009268      Variant of unknown origin
##  1019245      Variant of unknown origin
##      mutation.verification.status      REF.cosmic      ALT.cosmic      cosmic_1
##      <character> <character> <character> <character>
##      2523      Verified      A      T      A
##      5776      Verified      C      T      C
##      16739      Verified      C      T      C
##      18114      Unverified      C      T      C
##      25195      Unverified      G      A      G
##      ...      ...      ...      ...      ...
##  973795      Unverified      G      A      G
##  978788      Unverified      C      T      C
##  980288      Unverified      G      A      G
##  1009268      Unverified      T      A      T
##  1019245      Unverified      C      G      C
##      cosmic_2
##      <character>
##      2523      T
##      5776      T
##      16739      T
##      18114      T
##      25195      A
##      ...      ...
##  973795      A

```

```
##      978788          T
##      980288          A
##     1009268          A
##     1019245          G
##     -----
##     seqinfo: 24 sequences from an unspecified genome; no seqlengths
```

The following function adds metadata from one GRanges object to another for any overlapping positions, while keeping all the positions in the query object.

```
addMetadata = function(query, subject, column.suffix) {

  # Find overlapping ranges
  hits = findOverlaps(query, subject)

  for ( column in names(mcols(subject)) ) {

    # Create empty metadata column to be filled
    mcols(query)[paste(column, column.suffix, sep='')] = NA

    # Convert DNASTringSet and DNASTringSetList columns to character vectors
    if (class(mcols(subject)[[column]])[1] == 'DNASTringSet') {
      mcols(subject)[column] = as.character(mcols(subject)[[column]])
    } else if (class(mcols(subject)[[column]])[1] == 'DNASTringSetList') {
      mcols(subject)[column] =
        unstrsplit(CharacterList(mcols(subject)[[column]]))
    }

    # Add subject metadata to query
    mcols(query)[queryHits(hits), paste(column, column.suffix, sep='')] =
      mcols(subject)[subjectHits(hits), column]
  }
  return(query)
}
```

## Comparison with COSMIC SNP profile

```
# Add COSMIC data to variant calling data.
data = as.data.frame(addMetadata(data.gr, cosmic.gr, ''))

# Filter and remove empty rows.
data = data[data$filter=='None' & data$DP > 9, ]

# Check for variant calling genotypes matching those in COSMIC.
alleles = c('cosmic_1', 'cosmic_2', 'sample_1', 'sample_2')
idx.notna = row.names(subset(data, rowSums(is.na(data[, alleles])) == 0))
data[idx.notna, 'match.cosmic'] = 'no'

data[idx.notna, 'for.1'] = paste(data[idx.notna, 'cosmic_1'],
                                data[idx.notna, 'cosmic_2'], sep=':')
data[idx.notna, 'rev.1'] = paste(data[idx.notna, 'cosmic_2'],
                                data[idx.notna, 'cosmic_1'], sep=':')
```

```

data['for.2'] = paste(data[, 'sample_1'], data[, 'sample_2'], sep=':')

idx.ok.1 = apply(data, 1, function(x) x['for.1'] %in% x['for.2'])
idx.ok.2 = apply(data, 1, function(x) x['rev.1'] %in% x['for.2'])
data[idx.ok.1, 'match.cosmic'] = 'yes'
data[idx.ok.2, 'match.cosmic'] = 'yes'
data$for.1 = NULL
data$rev.1 = NULL

```

## Comparison with Yu *et al.* SNP genotyping panel

The file *yu.snps.txt* is included in the R Markdown directory, but can also be found in the supplementary data of (Yu et al. 2015). RefSNP orientation data for the 48 loci included in the Yu panel can be found at the dbSNP website, but is also included here as the *refsnp.strand.txt* file. (Sherry et al. 2000)

```

# Load Yu data
yu = read.table('yu.snps.txt', header=TRUE, sep='\t')
yu[1:6, 1:5]

```

```

##      CLID      cName Cell.Line.Name rs10018359 rs10834627
## 1 587114    105KC      105KC          T:T          C:C
## 2 586793   1321N1     1321N1         C:T          T:T
## 3 584976    143B      143B           C:C          T:T
## 4 586577   184A1     184A1         C:T          C:C
## 5 584462   22Rv1     22Rv1         C:T          T:T
## 6 586854 23132/87    23132/87       T:T          C:T

```

```

yu$cName = tolower(gsub('[-_ ]', '', yu$cName))
yu = t(subset(yu, cName=='colo205'))
yu = data.frame(alleles=yu[4:nrow(yu), ])
yu$rsID = row.names(yu)
yu = data.frame(yu[yu$alleles != '', ])
yu$alleles = as.character(yu$alleles)

```

```

# Load RefSNP orientation data and merge with Yu data.
strand = read.table('refsnp.strand.txt', header=TRUE)
head(strand)

```

```

##      rsID strand
## 1 rs12537      +
## 2 rs18579      +
## 3 rs260690     +
## 4 rs279844     +
## 5 rs315791     +
## 6 rs316598     +

```

```

yu = merge(yu, strand, by='rsID', all.x=TRUE)

```

```

# Complement reverse-strand mutations.
idx = row.names(subset(yu, strand=='-'))
yu[idx, 'alleles'] = chartr('ATCG','TAGC', yu[idx, 'alleles'])

```

```

# Compare Yu SNPs with variant calling data.
suppressPackageStartupMessages(library(plyr))

yu$alleles.rev = reverse(yu$alleles)
yu$strand = NULL
names(yu) = c('rsID', 'yu.genotype', 'rev.yu')
data = join(data, yu, by='rsID', type='left')

alleles = c('for.2', 'yu.genotype', 'rev.yu')
idx.notna = row.names(subset(data, rowSums(is.na(data[, alleles])) == 0))
data[idx.notna, 'match.yu'] = 'no'

idx.ok.1 = apply(data, 1, function(x) x['yu.genotype'] %in% x['for.2'])
idx.ok.2 = apply(data, 1, function(x) x['rev.yu'] %in% x['for.2'])
data[idx.ok.1, 'match.yu'] = 'yes'
data[idx.ok.2, 'match.yu'] = 'yes'
data$for.2 = NULL
data$rev.yu = NULL

```

## Results

Calculate and print comparisons between variant calling data and COSMIC / Yu SNPs, respectively.

```

data.cosmic = data[!is.na(data$match.cosmic), ]
n.cosmic = dim(data.cosmic)[1]
n.cosmic.match = dim(data.cosmic[data.cosmic$match.cosmic=='yes', ])[1]
conc.cosmic = round(n.cosmic.match / n.cosmic * 100, 1)

data.yu = data[!is.na(data$match.yu), ]
n.yu = dim(data.yu)[1]
n.yu.match = dim(data.yu[data.yu$match.yu=='yes', ])[1]

cat(paste('Unique SNPs\tCalls\tMatches\tConcordance\tYu calls\tYu matches\n',
          n.unique.snps, '\t\t', n.cosmic, '\t', n.cosmic.match, '\t\t',
          conc.cosmic, '\t', n.yu, '\t', n.yu.match, '\n', sep=''))

```

```

## Unique SNPs  Calls  Matches Concordance Yu calls  Yu matches
## 241          68  67      98.5      2      2

```

## Results: RNA variant calls vs. COSMIC SNP profiles

Data is provided in *auth.collected.txt*.

```

data = read.table('auth.collected.txt', header=TRUE, sep='\t',
                 stringsAsFactors = FALSE, na='')
data$match.cosmic = factor(data$match.cosmic, levels=c('yes', 'no'))
data$match.yu = factor(data$match.yu, levels=c('yes', 'no'))

suppressPackageStartupMessages(library(dplyr))
suppressPackageStartupMessages(library(ggplot2))

```



```

# Total filtered variant calls per cell line (Table 1)
total.calls = data %>% group_by(sample) %>% summarise(count=n())
total.calls

```

```

## Source: local data frame [8 x 2]
##
##   sample count
##   (chr) (int)
## 1 colo205 38777
## 2  dld1  72203
## 3 hct116a 177948
## 4 hct116b 44231
## 5  hct15  55195
## 6  hke3  670153
## 7  ht29  38456
## 8   rko  250042

```

```

# Count unique SNPs in each cell line (Table 2)
lines = c('colo205', 'hct116', 'hct15', 'ht29', 'rko')
lines.count = data.frame()
for ( line in lines ) {
  cosmic = cosmic.all[cosmic.all$sample.name == line, ]

  # Remove duplicates
  cosmic$gene.name = gsub('_ENST\\d+', '', cosmic$gene.name)
  cosmic = cosmic[!duplicated(cosmic[, c('gene.name',
                                         'mutation.genome.position')]), ]
  cosmic = cosmic[grep('Substitution', cosmic$mutation.description), ]

  lines.count[line, 'count'] = dim(cosmic)[1]
}
lines.count

```

```

##           count
## colo205    241
## hct116    2428
## hct15     7649
## ht29       462
## rko       2676

```

```

# Variant calls in COSMIC sites (Table 2)
cosmic = data[!is.na(data$mutation.id), ]
cosmic.calls = cosmic %>% group_by(sample) %>% summarise(count=n())
cosmic.calls

```

```

## Source: local data frame [8 x 2]
##
##   sample count
##   (chr) (int)
## 1 colo205    68
## 2  dld1   2239
## 3 hct116a 1122

```

```
## 4 hct116b 1003
## 5 hct15 3356
## 6 hke3 1379
## 7 ht29 145
## 8 rko 1112
```

*# Concordance with COSMIC (Table 2)*

```
cosmic.conc = cosmic %>% group_by(sample, match.cosmic) %>%
  summarise(count=n()) %>% mutate(perc=round(count/sum(count) * 100, 1))
cosmic.conc
```

```
## Source: local data frame [16 x 4]
```

```
## Groups: sample [8]
```

```
##
##   sample match.cosmic count perc
##   (chr)      (fctr) (int) (dbl)
## 1 colo205      yes    67  98.5
## 2 colo205      no     1   1.5
## 3 dld1         yes  2211 98.7
## 4 dld1         no    28   1.3
## 5 hct116a     yes  1094 97.5
## 6 hct116a     no    28   2.5
## 7 hct116b     yes   986 98.3
## 8 hct116b     no    17   1.7
## 9 hct15       yes  3331 99.3
## 10 hct15      no    25   0.7
## 11 hke3       yes  1326 96.2
## 12 hke3       no    53   3.8
## 13 ht29      yes   143 98.6
## 14 ht29      no     2   1.4
## 15 rko       yes  1073 96.5
## 16 rko       no    39   3.5
```

*# Variant calls in Yu sites (Table 2)*

```
yu = data[!is.na(data$match.yu), ]
yu.calls = yu %>% group_by(sample, match.yu) %>% summarise(count=n())
yu.calls
```

```
## Source: local data frame [8 x 3]
```

```
## Groups: sample [?]
```

```
##
##   sample match.yu count
##   (chr)      (fctr) (int)
## 1 colo205      yes     2
## 2 dld1         yes     2
## 3 hct116a     yes     2
## 4 hct116b     yes     2
## 5 hct15       yes     2
## 6 hke3       yes     7
## 7 ht29      yes     2
## 8 rko       yes     2
```

```

# Characterisation plot: SNP impact (Figure 3A)
cosmic$impact = factor(cosmic$impact, levels=c('HIGH', 'MODERATE', 'LOW',
                                              'MODIFIER'))
impact = cosmic %>% group_by(match.cosmic, impact) %>% summarise(count=n()) %>%
  mutate(perc=round(count/sum(count) * 100, 1))
gg.impact = ggplot(impact, aes(x=impact, y=perc, fill=match.cosmic)) +
  geom_bar(stat='identity', position='dodge', color='black', size=0.3) +
  theme_bw() +
  labs(x='\nImpact', y='Proportion of calls (%)\n') +
  theme(legend.position='none', axis.text=element_text(size=14),
        panel.grid.major.x=element_blank(),
        axis.title=element_text(size=17.5)) +
  geom_text(data=impact, aes(label=count), position=position_dodge(width=0.9),
            vjust=-0.5) +
  scale_fill_grey()
gg.impact

```

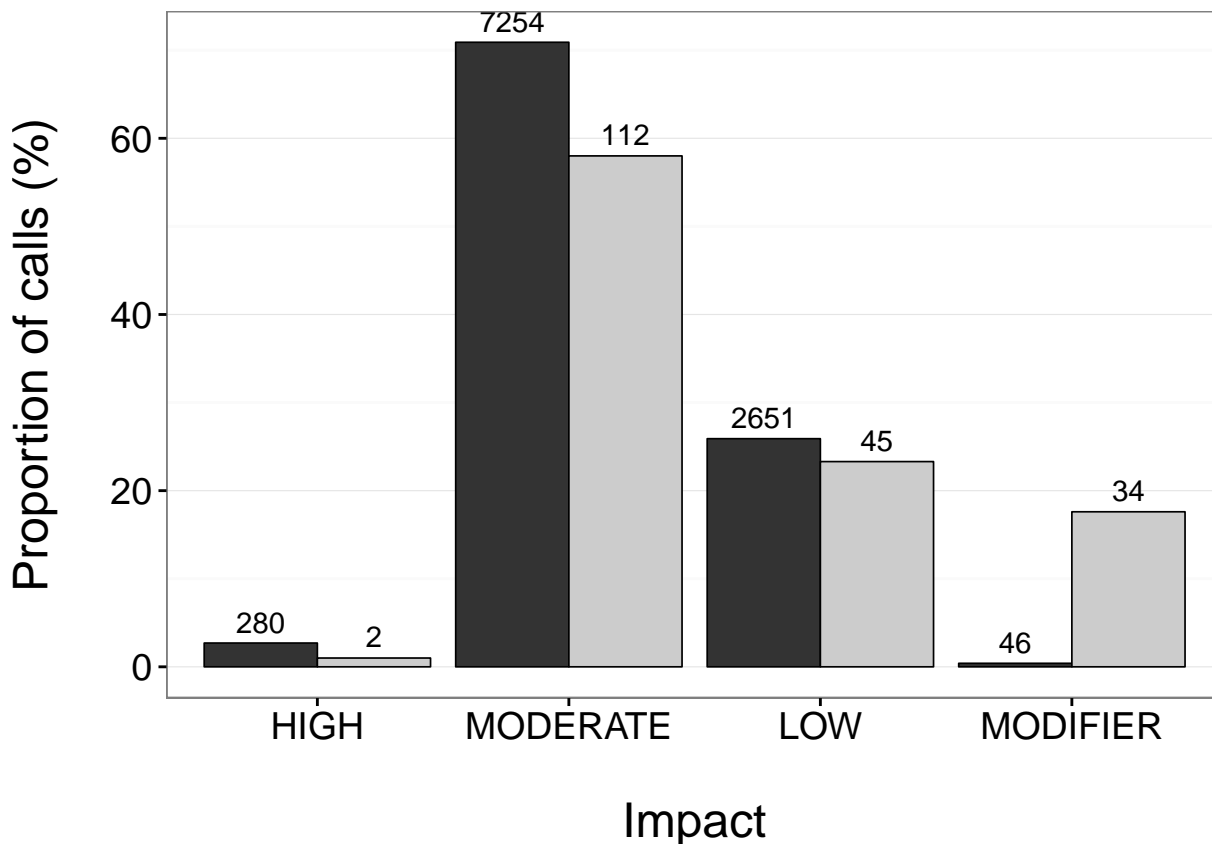

```

# Characterisation plot: SNP type (Figure 3B)
cosmic$mutation.description = gsub('Substitution - ', '',
                                   cosmic$mutation.description)
cosmic$mutation.description = factor(cosmic$mutation.description,
                                     levels=c('Missense', 'Nonsense', 'coding silent'))
type = cosmic %>% group_by(match.cosmic, mutation.description) %>%
  summarise(count=n()) %>% mutate(perc=round(count/sum(count)*100, 1))
gg.type = ggplot(type, aes(x=mutation.description, y=perc, fill=match.cosmic)) +
  geom_bar(stat='identity', position='dodge', color='black', size=0.3) +

```

```

theme_bw() +
labs(x='\nSNP type', y='Proportion of calls (%)\n') +
theme(legend.position='none', axis.text=element_text(size=14),
      panel.grid.major.x=element_blank(),
      axis.title=element_text(size=17.5)) +
scale_x_discrete(labels=c('Missense', 'Nonsense', 'Coding silent')) +
geom_text(data=type, aes(label=count), position=position_dodge(width=0.9),
          vjust=-0.5) +
scale_fill_grey()
gg.type

```

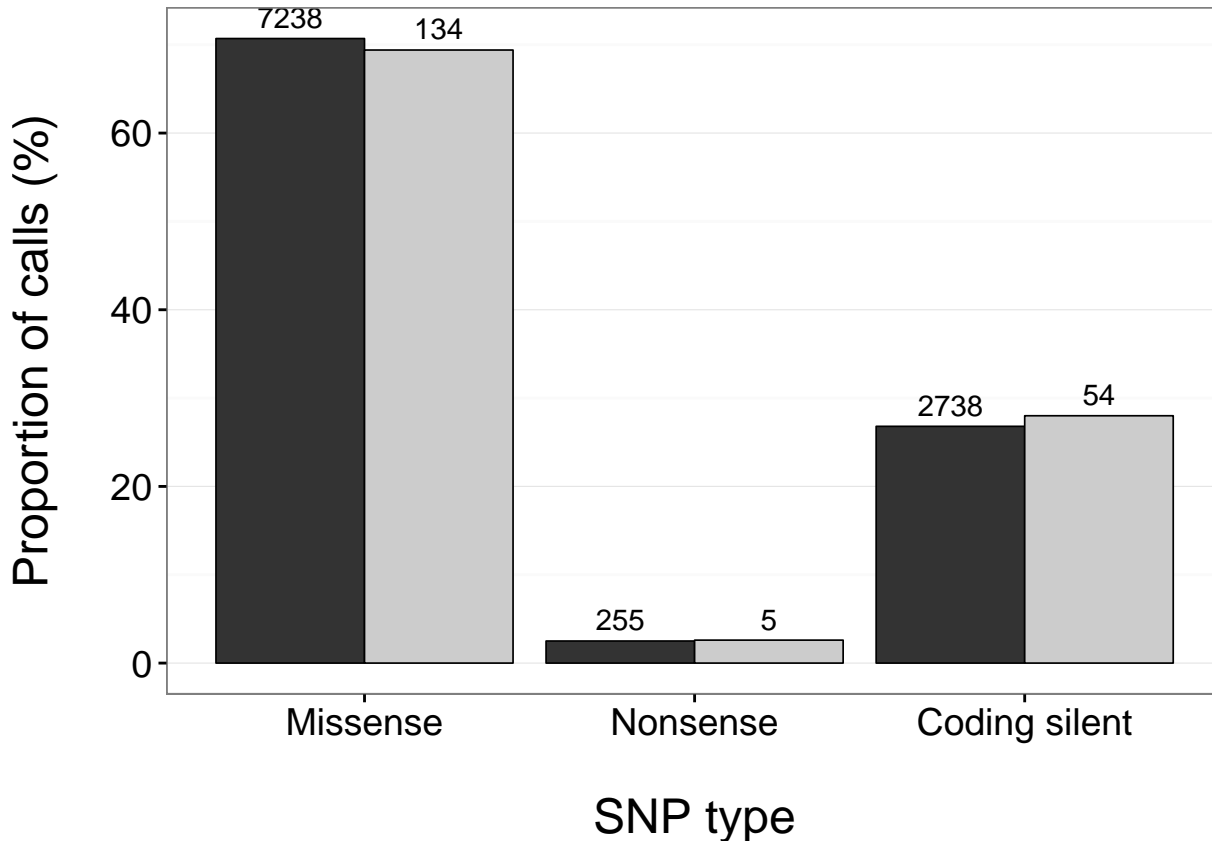

## Results: Subsamples vs. COSMIC SNP profiles

Data is provided in *auth.subsamples.collected.txt*.

```

subsamples = read.table('auth.subsamples.collected.txt', header=TRUE, sep='\t',
                        stringsAsFactors=FALSE, na='')

# Subset for COSMIC data; get cell line names and subsampling proportions.
cosmic = subsamples[!is.na(subsamples$match.cosmic), ]
cosmic$name = sapply(cosmic$sample, function(x) strsplit(x, '_')[[1]][1])
cosmic$subsample = sapply(cosmic$sample, function(x) strsplit(x, '_')[[1]][3])

# Get total and matching number of COSMIC SNPs per cell line.
data = cosmic %>% group_by(name, subsample) %>% summarise(total=n())

```

```

matches = cosmic[cosmic$match.cosmic=='yes', ] %>%
  group_by(name, subsample) %>% summarise(yes=n())

# Merge, calculate concordance, prepare for plotting.
data$yes = matches$yes
data$conc = round(data$yes / data$total * 100, 1)
data$subsample = as.numeric(data$subsample) * 100
data$subsample = factor(data$subsample, levels=c('100', '90', '80', '70',
  '60', '50', '40', '30', '20', '10', '5', '2', '1'))
cbPalette = c("#0072B2", "#E69F00", "#56B4E9", "#ECDE13", "#009E73", "#D55E00")

# Subsampling plot: HCT116a only (Figure 2)
hct116a = data[data$name=='hct116a', ]
hjust = c(rep(1.15, 7), rep(0.75, 2), 0.65, rep(0.5, 3))
vjust = c(rep(1.5, 2), rep(1, 5), rep(2, 6))

gg.hct116a = ggplot(hct116a, aes(x=subsample, y=total)) +
  geom_point(size=2, colour='black') +
  geom_line(data=hct116a, aes(group=1), colour='black') +
  theme_bw() +
  labs(x='\nSubsampling proportion (%)', y='Number of COSMIC SNPs\n') +
  theme(legend.position='none') +
  geom_text(data=hct116a, aes(label=paste(conc, '%', sep='')), vjust=vjust,
    hjust=hjust, colour='black')
gg.hct116a

```

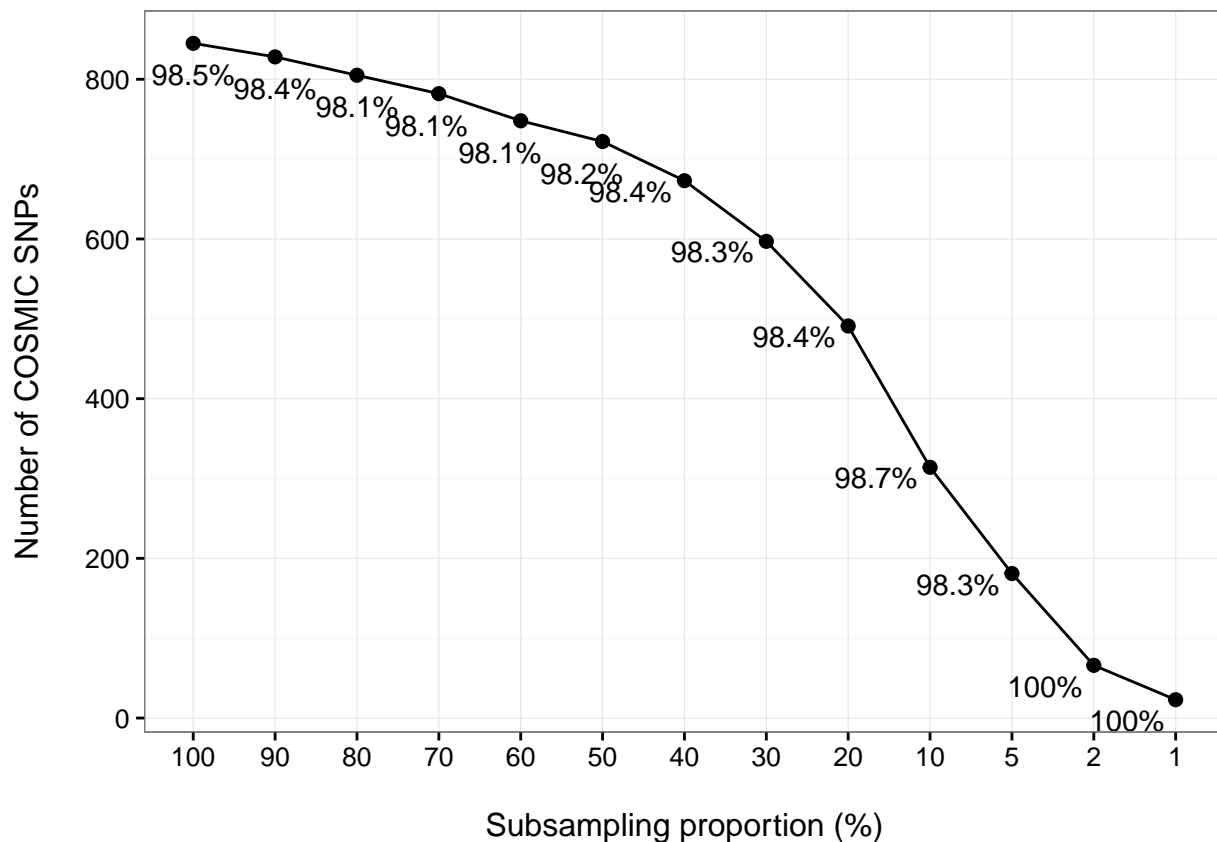

```

# Subsampling plot: number of COSMIC SNPs (Figure S2)
gg.snps = ggplot(data, aes(x=subsample, y=total, colour=name)) +
  geom_point() +
  geom_line(data=data, aes(group=name)) +
  theme_bw() +
  labs(x='\nSubsampling proportion (%)', y='Number of COSMIC SNPs\n') +
  scale_colour_manual(name='Cell line', values=cbPalette) +
  theme(legend.position='none')
gg.snps

```

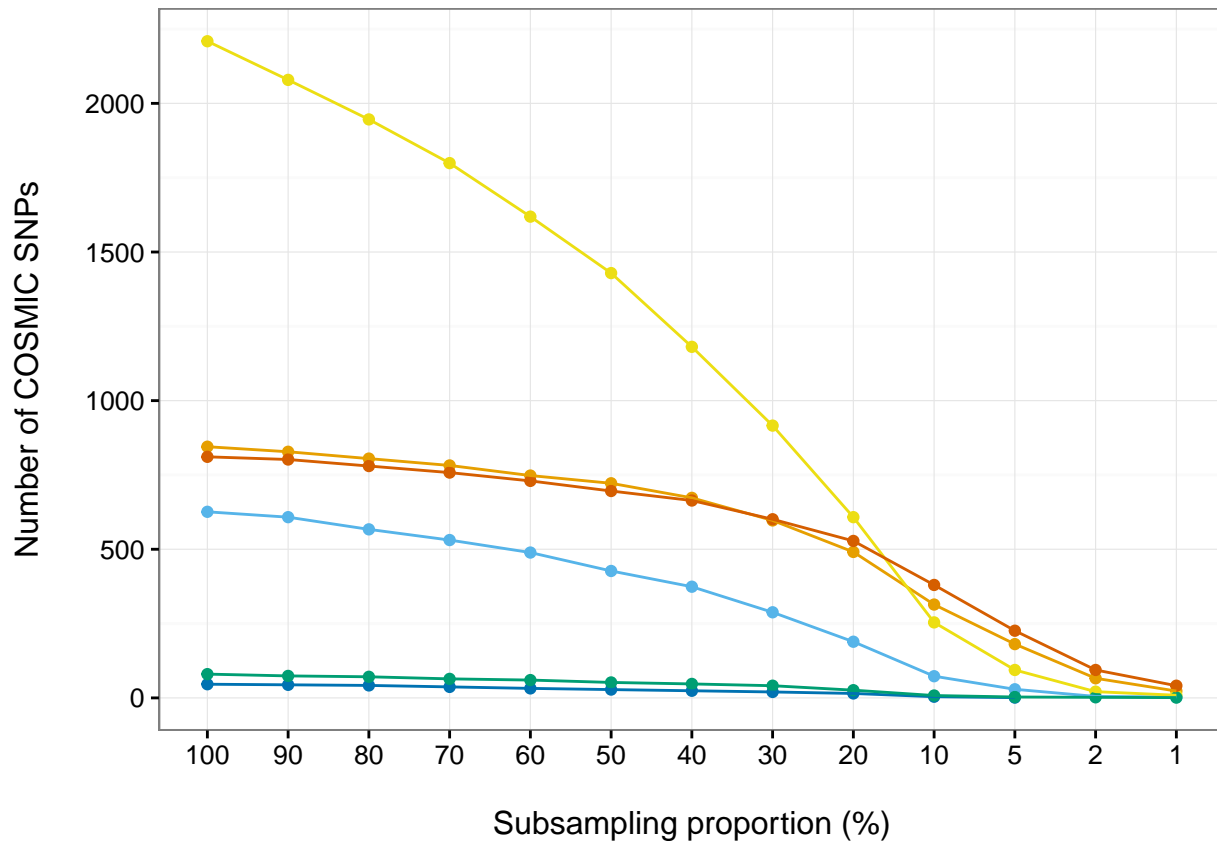

```

# Subsampling plot: concordance (Figure S2)
gg.conc = ggplot(data, aes(x=subsample, y=conc, colour=name)) +
  geom_point() +
  geom_line(data=data, aes(group=name)) +
  theme_bw() +
  labs(x='\nSubsampling proportion (%)', y='Concordance (%) \n') +
  scale_colour_manual(name='Cell line', values=cbPalette) +
  theme(legend.position='none') +
  ylim(90, 100)
gg.conc

```

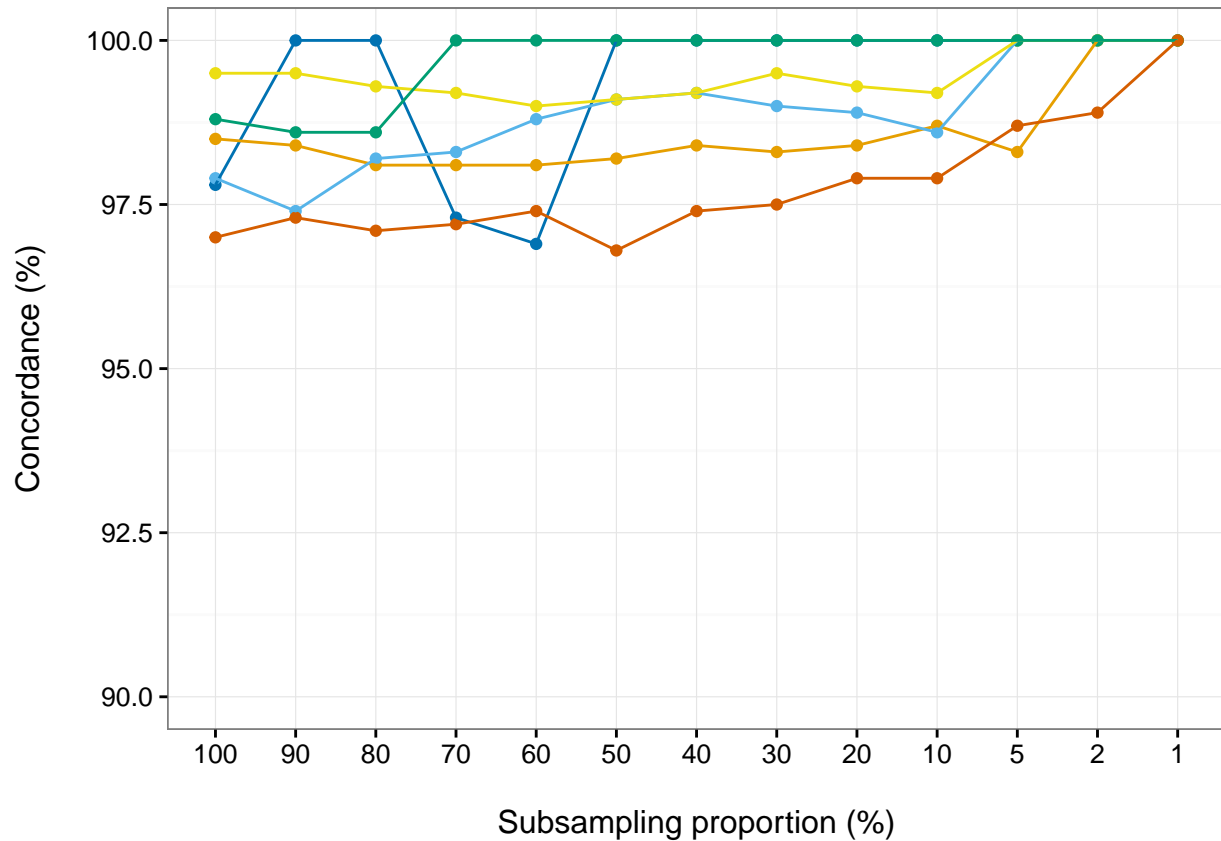

## Results: All RNA SNPs vs. all RNA SNPs

Data is provided in *auth.rna.vs.rna.collected.txt*.

```
# Load data
data.all.rna = read.table('auth.rna.vs.rna.collected.txt',
                        header=TRUE, sep='\t', na='', fill=TRUE)

# Create data frame to be filled out with data
lines = c('colo205', 'dld1', 'hct116a', 'hct116b',
          'hct15', 'hke3', 'ht29', 'rko')
data = data.frame()
n = 1
for ( line in lines ) {
  for ( comp in lines ) {
    data[n, 'sample'] = line
    data[n, 'comparison'] = comp
    n = n + 1
  }
}

# Add total SNPs
total = data.all.rna %>% group_by(sample.input.1, sample.input.2) %>%
  summarise(total=n())
total = total[!is.na(total$sample.input.2), ]
data = merge(data, total, by.x=c('sample', 'comparison'),
```

```

        by.y=c('sample.input.1','sample.input.2'), all.x=TRUE)

# Add concordance
yes = data.all.rna %>% group_by(sample.input.1, sample.input.2, match) %>%
  summarise(matches=n())
yes = yes[!is.na(yes$sample.input.2), ]
yes = yes[yes$match=='yes', ]
data = merge(data, yes[c(1:2, 4)], by.x=c('sample','comparison'),
            by.y=c('sample.input.1','sample.input.2'), all.x=TRUE)
data$concordance = round(data$matches / data$total * 100, 1)

# Plot
data$text.colour = 'black'
data[data$concordance > 90, 'text.colour'] = 'white'
data$sample = toupper(data$sample)
data$comparison = toupper(data$comparison)
data[data$sample=='HCT116A', 'sample'] = 'HCT116a'
data[data$sample=='HCT116B', 'sample'] = 'HCT116b'
data[data$comparison=='HCT116A', 'comparison'] = 'HCT116a'
data[data$comparison=='HCT116B', 'comparison'] = 'HCT116b'
gg.all.rna = ggplot(data, aes(x=sample, y=comparison, fill=concordance)) +
  geom_tile(colour='black', size=0.3) +
  coord_equal() +
  theme(axis.ticks=element_blank(), panel.background=element_blank(),
        axis.text.x=element_text(angle=90, hjust=1)) +
  labs(x=NULL, y=NULL, fill='Concordance (%)') +
  geom_text(colour=data$text.colour, size=3, aes(
    label=paste(concordance, '%', sep=''))) +
  scale_fill_gradient(low='white', high='#666666')
gg.all.rna

```



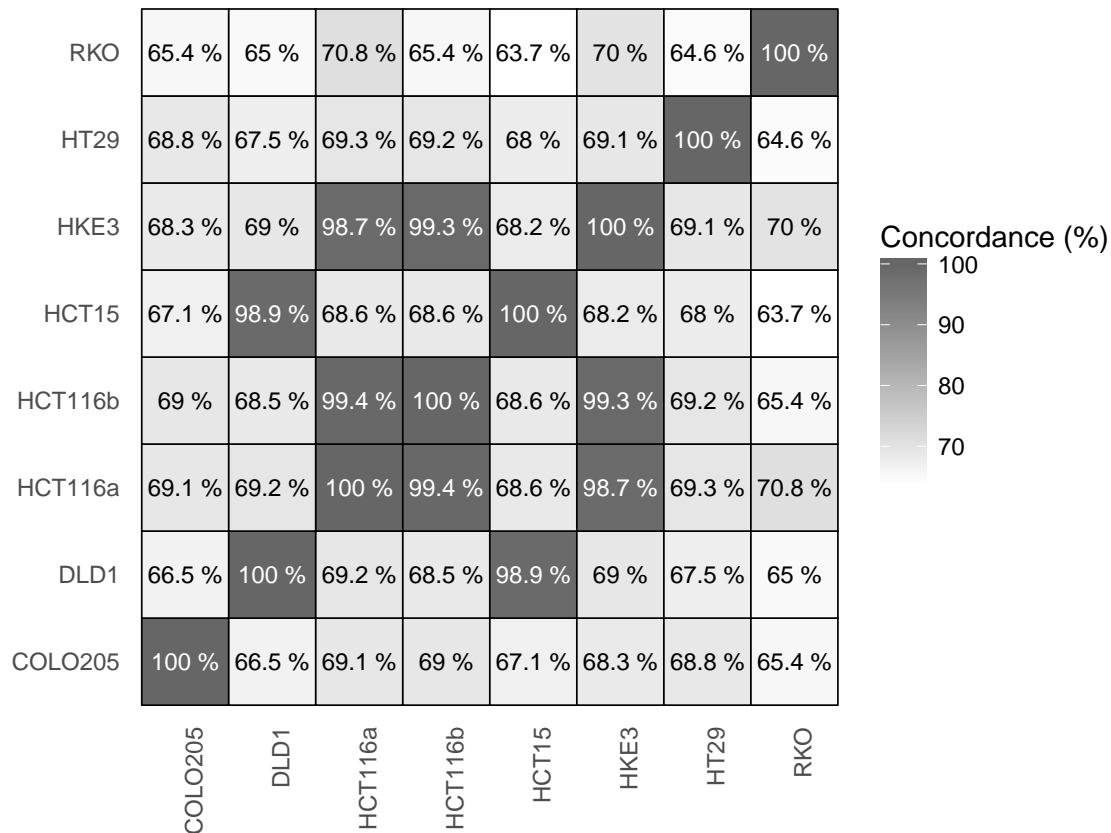

## Results: All RNA SNPs vs. COSMIC SNP profiles

Data is provided in *auth.rna.vs.cosmic.collected.txt*.

```
# Load data
data.all.cosmic = read.table('auth.rna.vs.cosmic.collected.txt',
                             header=TRUE, sep='\t')

# Create data frame to be filled out with data
lines = c('colo205', 'dld1', 'hct116a', 'hct116b',
          'hct15', 'hke3', 'ht29', 'rko')
comparisons = c('colo205', 'hct116', 'hct15', 'ht29', 'rko')
data = data.frame()
n = 1
for ( line in lines ) {
  for ( comp in comparisons ) {
    data[n, 'sample'] = line
    data[n, 'comparison'] = comp
    n = n + 1
  }
}

# Add totals and unique SNPs
total = data.all.cosmic %>% group_by(sample.name, sample) %>%
  summarise(total=n())
data = merge(data, total, by.x=c('sample', 'comparison'),
```

```

        by.y=c('sample','sample.name'), all.x=TRUE)
data = merge(data, lines.count, by.x='comparison', by.y='row.names', all.x=TRUE)
data$coverage = round(data$total / data$count * 100, 1)

# Add concordance
yes = data.all.cosmic %>% group_by(sample.name, sample, match.cosmic) %>%
  summarise(yes=n())
yes = yes[yes$match.cosmic=='yes', ]
yes$match.cosmic = NULL
data = merge(data, yes, by.x=c('sample','comparison'),
             by.y=c('sample','sample.name'), all.x=TRUE)
data$concordance = round(data$yes / data$total * 100, 1)
data[is.na(data)] = 0

# Plot
data$text.colour = 'black'
data[data$coverage > 20, 'text.colour'] = 'white'
data$sample = toupper(data$sample)
data$comparison = toupper(data$comparison)
data[data$sample=='HCT116A', 'sample'] = 'HCT116a'
data[data$sample=='HCT116B', 'sample'] = 'HCT116b'
data$sample = factor(data$sample,
  levels=c('COL0205', 'HCT116a', 'HCT116b', 'HKE3', 'DLD1', 'HCT15', 'HT29', 'RKO'))

gg.all.cosmic = ggplot(data, aes(x=sample, y=comparison, fill=coverage)) +
  geom_tile(colour='black', size=0.3) +
  coord_equal() +
  theme(axis.ticks=element_blank(), panel.background=element_blank(),
        axis.text.x=element_text(angle=90, hjust=1)) +
  labs(x='\nRNA-seq variant calls', y='COSMIC profile', fill='Coverage (%)') +
  scale_fill_gradient(low='white', high='#666666') +
  geom_text(color=data$text.colour, size=3,
           aes(label=paste(concordance, '%\n(', coverage, '%)', sep='')))
gg.all.cosmic

```

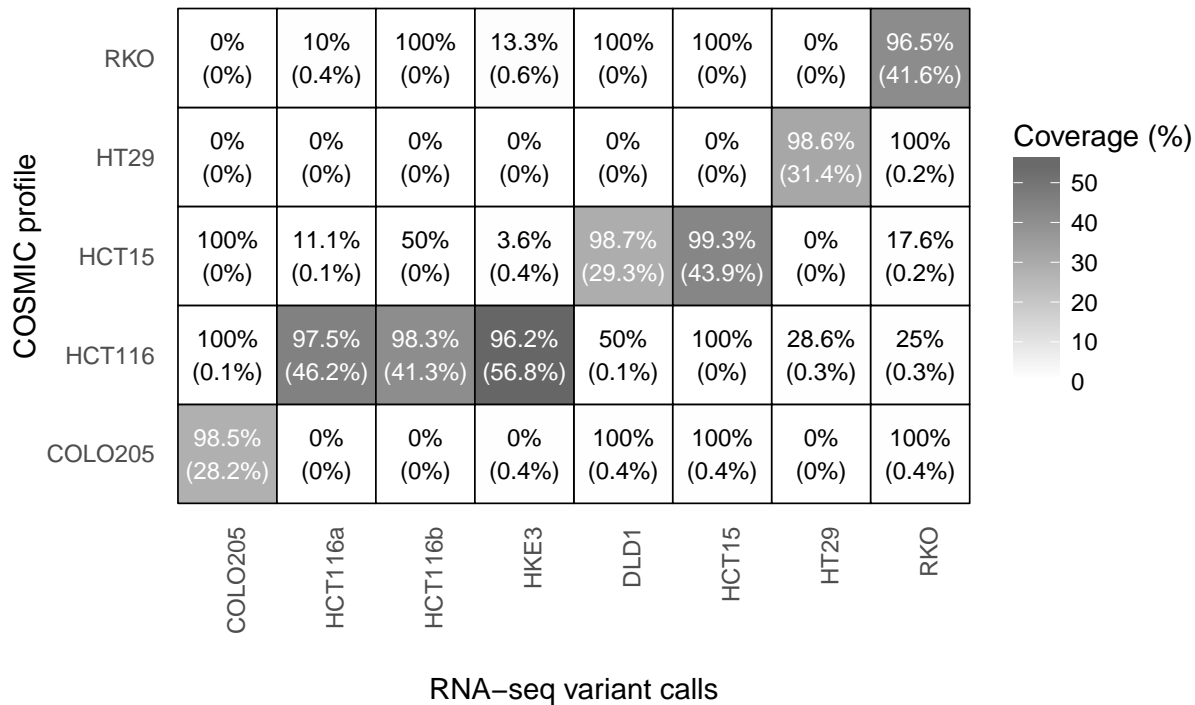

## Session info

```
## R version 3.2.3 (2015-12-10)
## Platform: x86_64-apple-darwin13.4.0 (64-bit)
## Running under: OS X 10.10.5 (Yosemite)
##
## locale:
## [1] en_US.UTF-8/en_US.UTF-8/en_US.UTF-8/C/en_US.UTF-8/en_US.UTF-8
##
## attached base packages:
## [1] stats4      parallel    stats      graphics  grDevices  utils      datasets
## [8] methods    base
##
## other attached packages:
## [1] ggplot2_2.0.0      dplyr_0.4.3      plyr_1.8.3
## [4] GenomicRanges_1.22.4 GenomeInfoDb_1.6.3 IRanges_2.4.6
## [7] S4Vectors_0.8.11  BiocGenerics_0.16.1
##
## loaded via a namespace (and not attached):
## [1] Rcpp_0.12.3      knitr_1.12.3     XVector_0.10.0  magrittr_1.5
## [5] zlibbioc_1.16.0 munsell_0.4.2    colorspace_1.2-6 R6_2.1.2
## [9] stringr_1.0.0    tools_3.2.3     grid_3.2.3      gtable_0.1.2
## [13] DBI_0.3.1        htmltools_0.3    lazyeval_0.1.10 yaml_2.1.13
## [17] digest_0.6.9     assertthat_0.1   formatR_1.3     evaluate_0.8
## [21] rmarkdown_0.9.5 labeling_0.3     stringi_1.0-1   scales_0.3.0
```

## References

Forbes, Simon A, David Beare, Prasad Gunasekaran, Kenric Leung, Nidhi Bindal, Harry Boutselakis, Minjie Ding, et al. 2015. “COSMIC: exploring the world’s knowledge of somatic mutations in human cancer.” *Nucleic Acids Research* 43 (Database issue): D805–11.

Sherry, S T, M H Ward, M Kholodov, J Baker, L Phan, E M Smigielski, and K Sirotkin. 2000. “dbSNP: the NCBI database of genetic variation.” *Nucleic Acids Research* 29 (1): 308–11.

Yu, Mamie, Suresh K Selvaraj, May M Y Liang-Chu, Sahar Aghajani, Matthew Busse, Jean Yuan, Genee Lee, et al. 2015. “A resource for cell line authentication, annotation and quality control.” *Nature* 520 (7547): 307–11.
